# Supplementary material for: Effects of parental care on skin microbial community composition in poison frogs
Source: eLife. 2025 Jul 31;14:RP103331. doi: 10.7554/eLife.103331 (PMC12313234; doi:10.7554/eLife.103331)
Supplement: Supplementary file 2. — Differentially abundant genera between experimental conditions (N = 10 transported, N = 8 non-transported tadpoles) were determined with the R package ANCOMBC2. [file elife-103331-supp2.xlsx]

## Sheet: Sheet1
										Effect size (log fold change)		Standard error		Test statistic		p-value (Significance)		adjusted p-value		statistical difference
	taxon	structural_zero (not transported)	structural_zero (transported)	Phylum	Class	Order	Family	Genus	ASV	lfc_(Intercept)	lfc_tt_stageT_tt	se_(Intercept)	se_tt_stageT_tt	W_(Intercept)	W_tt_stageT_tt	p_(Intercept)	p_tt_stageT_tt	q_(Intercept)	q_tt_stageT_tt	diff_(Intercept)	diff_tt_stageT_tt
	Cetobacterium	FALSE	FALSE	Fusobacteriota	Fusobacteriia	Fusobacteriales	Fusobacteriaceae	Cetobacterium	ASV1	1.09195	-1.64757	0.297054	0.574329	3.67592	-2.86868	0.00365169	0.0152775	0.00912923	0.0381938	TRUE	TRUE
	Novosphingobium	FALSE	FALSE	Proteobacteria	Alphaproteobacteria	Sphingomonadales	Sphingomonadaceae	Novosphingobium	ASV4	-0.0458641	0.266463	0.539686	0.847169	-0.084983	0.314533	0.933399	0.757449	0.994266	0.830586	FALSE	FALSE
	uncultured_1	FALSE	FALSE	Proteobacteria	Alphaproteobacteria	Rhodospirillales	Magnetospirillaceae	uncultured	ASV21	-0.478986	0.109144	0.189607	0.491445	-2.52621	0.222088	0.0394511	0.830586	0.0657518	0.830586	FALSE	FALSE
	Tyzzerella	FALSE	FALSE	Firmicutes	Clostridia	Lachnospirales	Lachnospiraceae	Tyzzerella	ASV153	0.0013637	-0.295334	0.178381	0.378354	0.00764492	-0.780575	0.994266	0.478664	0.994266	0.797773	FALSE	FALSE
	Burkholderia-Caballeronia-Paraburkholderia	FALSE	FALSE	Proteobacteria	Gammaproteobacteria	Burkholderiales	Burkholderiaceae	Burkholderia-Caballeronia-Paraburkholderia	ASV253	-1.1662	1.63305	0.239134	0.537349	-4.87675	3.03908	0.000380608	0.0102915	0.00190304	0.0381938	TRUE	TRUE
	Limnohabitans	FALSE	TRUE	Proteobacteria	Gammaproteobacteria	Burkholderiales	Comamonadaceae	Limnohabitans	ASV40
	Pelomonas	TRUE	FALSE	Proteobacteria	Gammaproteobacteria	Burkholderiales	Comamonadaceae	Pelomonas	ASV8
	Rhodomicrobium	TRUE	FALSE	Proteobacteria	Alphaproteobacteria	Rhizobiales	Rhodomicrobiaceae	Rhodomicrobium	ASV10
	Mycobacterium	TRUE	FALSE	Actinobacteriota	Actinobacteria	Corynebacteriales	Mycobacteriaceae	Mycobacterium	ASV13
	Candidatus_Koribacter	TRUE	FALSE	Acidobacteriota	Acidobacteriae	Acidobacteriales	Koribacteraceae	Candidatus_Koribacter	ASV17
	uncultured_2	TRUE	FALSE	Verrucomicrobiota	Verrucomicrobiae	Pedosphaerales	Pedosphaeraceae	uncultured	ASV47
